# Supplementary material for: One-step 3D printed intelligent silk fibroin artificial skin with built-in electronics and microfluidics
Source: Royal Society of Chemistry journal article supplement (doi:10.1039/d1an01257f), 2021-01-01
Supplement: d1an01257f1.pdf [file d1an01257f1.pdf]

## Supporting Information

### One-step 3D Printed Intelligent Silk Fibroin Artificial Skin with Built-In Electronic and Microfluidics

Maoze Guo, Qian Li, Bingbing Gao\* and Bingfang He\*

School of Pharmaceutical Sciences, Nanjing Tech University, Nanjing 211816, China.

E-mail: [gaobb@njtech.edu.cn](mailto:gaobb@njtech.edu.cn), [bingfanghe@njtech.edu.cn](mailto:bingfanghe@njtech.edu.cn).

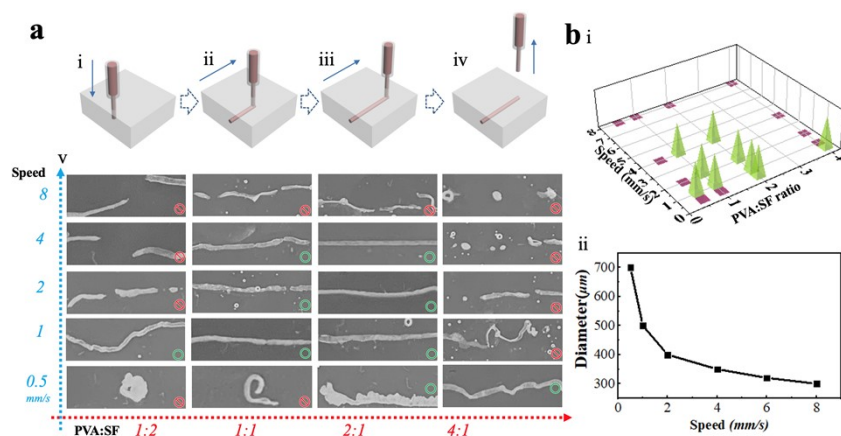

Figure S1: Printing performance of the vaseline inks inside PU-SF precursor. a) Schematic diagram of the printing process (i-immerse, ii, iii-moving, iv-lifting) and (v) photographs of vaseline inks printed in PU-SF precursor with various components ratio and printing speed (moving distance: 1cm). b) Printing performance (i), red: non-printable; green: printable and relationship between the diameter of the extruded lines and printhead moving speed (ii).

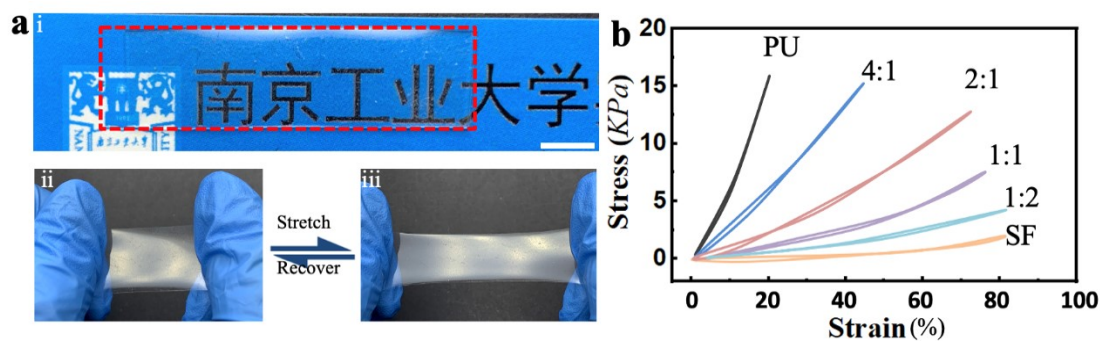

Figure S2: a) Optical images of the PU-SF membrane on a substrate with Nanjing Tech University badge (i), under stretch and recovery circulation (ii, iii). b) Schematic image of the self-healing mechanism.

Table S1. Comparison of abbreviations and full names.

| full names                               | abbreviations |
|------------------------------------------|---------------|
| intelligent silk fibroin artificial skin | i-skin        |
| photonic crystals                        | PCs           |

---

|                                                            |          |
|------------------------------------------------------------|----------|
| Silk fibroin                                               | SF       |
| $\alpha$ -fetoprotein                                      | AFP      |
| carcinoembryonic antigen                                   | CEA      |
| polyurethane                                               | PU       |
| brain natriuretic peptide                                  | BNP      |
| myoglobin                                                  | Myo      |
| fluorescein isothiocyanate-labeled<br>bovine serum albumin | FITC-BSA |
| cyanine 3                                                  | Cy3      |
| gauge factors                                              | GF       |

---
